# Supplementary material for: Causes of neonatal mortality using verbal autopsies in rural Southern Nepal, 2010–2017
Source: PubMed Central journal article supplement (PMC10021801; doi:10.1371/journal.pgph.0001072), 2022-09-15
Supplement: pgph.0001072.s001.pdf [file pgph.0001072.s001.pdf]

**NEPAL Oil Massage Study – NEONATAL VERBAL AUTOPSY FORM**

Week    Date       Worker ID    \_\_\_\_\_

VDC   Ward  Sector  HH

|        | NNIPSNUM                                                                                                                      | First Names | Last Name |
|--------|-------------------------------------------------------------------------------------------------------------------------------|-------------|-----------|
| Mother | <input type="text"/> <input type="text"/> <input type="text"/> <input type="text"/> <input type="text"/> <input type="text"/> | _____       | _____     |
| Father | <input type="text"/> <input type="text"/> <input type="text"/> <input type="text"/> <input type="text"/> <input type="text"/> | _____       | _____     |
| Child  | <input type="text"/> of <input type="text"/>                                                                                  | _____       | _____     |

**Form Status:**

1=completed Now: Met Status:  
2=Not met within 6 months (STOP)  
6=refused - **STOP**  
7=Permanently Moved - **STOP**

Vital Status

1=alive

1=yes  
1=6s

**Section A: General Information**

|    |                                                                   |                                                                                                                                         |                                           |
|----|-------------------------------------------------------------------|-----------------------------------------------------------------------------------------------------------------------------------------|-------------------------------------------|
| 1. | Relationship of primary respondent to deceased                    | 1=Mother<br>2=Father<br>3=Grandmother<br>4=Grandfather<br>5=Aunt<br>6=Other family member<br>7=TBA/ANM<br>8=Other _____<br>9=Don't Know | <input type="checkbox"/>                  |
| 2. | Was primary respondent present during the fatal illness or death? | 0=No to either<br>1=Yes to illness only<br>2=Yes to death only<br>3=Yes to both<br>9=Don't know                                         | <input type="checkbox"/>                  |
| 3. | Age of primary respondent                                         | 15-97 = Age in years<br>98=98 or more<br>99= Don't Know                                                                                 | <input type="text"/> <input type="text"/> |
| 4. | Primary respondent years of schooling                             | 00=None<br>01-20 = Years of schooling<br>99=Don't Know                                                                                  | <input type="text"/> <input type="text"/> |

**Section B: Vital Information**

|     |                                                         |                                                                                                                                                                          |
|-----|---------------------------------------------------------|--------------------------------------------------------------------------------------------------------------------------------------------------------------------------|
| 5.  | Date of Birth<br>(record dd / mm / yy)                  | <input type="text"/> <input type="text"/> - <input type="text"/> <input type="text"/> - <input type="text"/> <input type="text"/>                                        |
| 6.  | Date of Death<br>(record dd / mm / yy)                  | <input type="text"/> <input type="text"/> - <input type="text"/> <input type="text"/> - <input type="text"/> <input type="text"/>                                        |
| 7.  | Time of Death<br>(record hh:mm)                         | <input type="text"/> <input type="text"/> : <input type="text"/> <input type="text"/> <input type="text"/> →<br>1= 12:00 AM – 11:59 NOON<br>2= 12:00 PM – 11:59 MIDNIGHT |
| 8.  | Where did the child die?                                | 1=Home/maiti/family member's house<br>2=Hospital (Go to Q8a)<br>3=Other health facility (Go to Q8a)<br>4=in transit to facility<br>5=Other _____                         |
|     | <b>8a.</b> At what facility did he/she die?             | _____                                                                                                                                                                    |
| 9.  | Is the mother still alive?                              | 0=No (Go to Q9a)<br>1=Yes (Go to Q10)<br>9=Don't Know                                                                                                                    |
|     | <b>9a.</b> Did the mother die during or after delivery? | 1=During delivery (Go to Q10)<br>2=After delivery (Go to Q9b)<br>9=Don't Know (Go to Q10)                                                                                |
|     | <b>9b.</b> How long after the delivery did she die?     | 00-90 days<br>91=more than 90 days<br>99=Don't know                                                                                                                      |
| 10. | At birth, what was the size of the baby?                | 1=Very small<br>2=Smaller than usual<br>3=About average<br>4=Larger than average<br>9=Don't Know                                                                         |

**Section C: Neonatal Module**

|     |                                                             |                                                                                                                               |
|-----|-------------------------------------------------------------|-------------------------------------------------------------------------------------------------------------------------------|
| 11. | Did the child have an accident or injury just before death? | 0=No (Go to Q12)<br>1=Yes (Go to Q11a)<br>9=Don't Know                                                                        |
|     | <b>11a.</b> What kind of injury or accident?                | 1=Fall or blow<br>2=Burn<br>3=Severe cut<br>4=Snake bite<br>5=Animal bite<br>6=Road accident<br>7=Other _____<br>9=Don't Know |

|            |                                                                                         |                                                                      |                      |
|------------|-----------------------------------------------------------------------------------------|----------------------------------------------------------------------|----------------------|
|            | <b>11b.</b> How many days after the accident did the child die?                         | 00=Same day<br>01-28 = Number of days<br>99=Don't Know               | <input type="text"/> |
| <b>12.</b> | Did the baby stop being able to cry?                                                    | 0=No<br>1=Yes (Go to 12a)<br>9=Don't Know                            | <input type="text"/> |
|            | <b>12a.</b> How long before the baby died did the baby stop crying?                     | 1=Less than 1 day<br>2=One day or more<br>9=Don't know               | <input type="text"/> |
| <b>13.</b> | Was the baby able to suckle in a normal way during the first day of life?               | 0=No (Go to Q13a)<br>1=Yes (Go to Q13b)<br>9=Don't Know (Go to Q13a) | <input type="text"/> |
|            | <b>13a.</b> Did the baby ever suckle in a normal way?                                   | 0=No (Go to Q14)<br>1=Yes (Go to Q13b)<br>9=Don't Know (Go to Q14)   | <input type="text"/> |
|            | <b>13b.</b> Did the baby stop being able to suckle in a normal way?                     | 0=No (Go to Q14)<br>1=Yes (Go to Q13c)<br>9=Don't Know (Go to Q14)   | <input type="text"/> |
|            | <b>13c.</b> How long after birth the baby stop suckling?                                | 00=Less than 1 day<br>01-28 days<br>99=Don't Know                    | <input type="text"/> |
|            | <b>13d.</b> Was the baby able to open his/her mouth at the time he/she stopped sucking? | 0=No<br>1=Yes<br>9=Don't Know                                        | <input type="text"/> |
| <b>14.</b> | During the illness that led to death did the baby have difficulty breathing?            | 0=No (Go to Q15)<br>1=Yes (Go to Q14a-b)<br>9=Don't Know (Go to Q15) | <input type="text"/> |
|            | <b>14a.</b> At what age did the difficult breathing start                               | 00=Less than 1 day<br>01-28 days<br>99=Don't Know                    | <input type="text"/> |
|            | <b>14b.</b> For how many days did the difficult breathing last?                         | 00=Less than 1 day<br>01-28 days<br>99=Don't Know                    | <input type="text"/> |
| <b>15.</b> | During the illness that led to death did the baby have fast breathing?                  | 0=No (Go to Q16)<br>1=Yes (Go to Q15a-b)<br>9=Don't Know (Go to Q16) | <input type="text"/> |
|            | <b>15a.</b> At what age did the fast breathing start                                    | 00=Less than 1 day<br>01-28 days<br>99=Don't Know                    | <input type="text"/> |

|            |                                                                                                            |                                                                    |                                           |
|------------|------------------------------------------------------------------------------------------------------------|--------------------------------------------------------------------|-------------------------------------------|
|            | <b>15b.</b> For how many days did the fast breathing last?                                                 | 00=Less than 1 day<br>01-28 days<br>99=Don't Know                  | <input type="text"/> <input type="text"/> |
| <b>16.</b> | During the illness that led to death did the baby have indrawing of the chest?                             | 0=No<br>1=Yes<br>9=Don't Know                                      | <input type="checkbox"/>                  |
| <b>17.</b> | During the illness that led to death, did the baby have grunting?                                          | 0=No<br>1=Yes<br>9=Don't Know                                      | <input type="checkbox"/>                  |
| <b>18.</b> | During the illness that led to death, did the baby have spasms or convulsions?                             | 0=No<br>1=Yes<br>9=Don't Know                                      | <input type="checkbox"/>                  |
| <b>19.</b> | During the illness that led to death, did the baby have any stiffening of the body or arching of the back? | 0=No<br>1=Yes<br>9=Don't Know                                      | <input type="checkbox"/>                  |
| <b>20.</b> | During the illness that led to death, did the baby have fever?                                             | 0=No<br>1=Yes (Go to Q20a-b)<br>9=Don't Know                       | <input type="checkbox"/>                  |
|            | <b>20a.</b> At what age did the fever start?                                                               | 00=Less than 1 day<br>01-28 days<br>99=Don't Know                  | <input type="text"/> <input type="text"/> |
|            | <b>20b.</b> For how many days did the fever last?                                                          | 00=Less than 1 day<br>01-28 days<br>99=Don't Know                  | <input type="text"/> <input type="text"/> |
| <b>21.</b> | During the illness that led to death, did the baby become cold to touch?                                   | 0=No (Go to Q22)<br>1=Yes (Go to Q21a)<br>9=Don't Know (Go to Q22) | <input type="checkbox"/>                  |
|            | <b>21a.</b> At what age did the baby start feeling cold to touch?                                          | 00=Less than 1 day<br>01-28 days<br>99=Don't Know                  | <input type="text"/> <input type="text"/> |
| <b>22.</b> | During the illness that led to death, did the baby become lethargic after a period of normal activity?     | 0=No<br>1=Yes<br>9=Don't Know                                      | <input type="checkbox"/>                  |
| <b>23.</b> | During the illness that led to death, did the baby become unresponsive or unconscious?                     | 0=No<br>1=Yes<br>9=Don't Know                                      | <input type="checkbox"/>                  |
| <b>24.</b> | During the illness that led to death, did the baby have a bulging fontanelle?                              | 0=No<br>1=Yes<br>9=Don't Know                                      | <input type="checkbox"/>                  |

|     |                                                                                                                  |                                                                    |                                                             |
|-----|------------------------------------------------------------------------------------------------------------------|--------------------------------------------------------------------|-------------------------------------------------------------|
| 25. | During the illness that led to death did the baby have pus drainage from the umbilical cord stump?               | 0=No<br>1=Yes<br>9=Don't Know                                      | <input type="checkbox"/>                                    |
| 26. | During the illness that led to death, did the baby have redness of the umbilical cord stump?                     | 0=No (Go to Q27)<br>1=Yes (Go to Q26a)<br>9=Don't Know (Go to Q27) | <input type="checkbox"/>                                    |
|     | <b>26a.</b> Did the redness of the cord stump extend onto the abdominal skin?                                    | 0=No<br>1=Yes<br>9=Don't Know                                      | <input type="checkbox"/>                                    |
| 27. | During the illness that led to death, did the baby have skin bumps containing pus or a single large area of pus? | 0=No<br>1=Yes<br>9=Don't Know                                      | <input type="checkbox"/>                                    |
| 28. | During the illness that led to death, did the baby have ulcers (pits)?                                           | 0=No<br>1=Yes<br>9=Don't Know                                      | <input type="checkbox"/>                                    |
| 29. | During the illness that led to death, did the baby have an area of the skin with redness and swelling            | 0=No<br>1=Yes<br>9=Don't Know                                      | <input type="checkbox"/>                                    |
| 30. | During the illness that led to death, did the baby have and area of skin that turned black?                      | 0=No<br>1=Yes<br>9=Don't Know                                      | <input type="checkbox"/>                                    |
| 31. | During the illness that led to death, did the baby bleed from anywhere?                                          | 0=No (Go to Q32)<br>1=Yes (Go to Q31a)<br>9=Don't Know (Go to Q32) | <input type="checkbox"/>                                    |
|     | <b>31a.</b> From where did the baby bleed?                                                                       | <hr/> <hr/>                                                        |                                                             |
| 32. | During the illness that led to death, did the baby have more frequent loose or liquid stools than usual?         | 0=No (Go to Q33)<br>1=Yes (Go to Q32a)<br>9=Don't Know (Go to Q33) | <input type="checkbox"/>                                    |
|     | <b>32a.</b> How many stools did the baby have on the day that diarrhea/loose stools were most frequent?          | 01-98 = Number of stools<br>99=Don't Know                          | <input type="text" value=""/> <input type="text" value=""/> |
| 33. | During the illness that led to death, did the baby vomit everything each time after feeding?                     | 0=No<br>1=Yes<br>9=Don't Know                                      | <input type="checkbox"/>                                    |
| 34. | During the illness that led to death, did the baby have yellow skin?                                             | 0=No<br>1=Yes<br>9=Don't Know                                      | <input type="checkbox"/>                                    |
